# Supplementary material for: Comparing efficacy and safety of upfront treatment strategies for anaplastic lymphoma kinase-positive non-small cell lung cancer: a network meta-analysis
Source: PubMed Central journal article supplement (PMC10784113; doi:10.37349/etat.2023.00187), 2023-12-01
Supplement: 1002187_sup_1.pdf [file 1002187_sup_1.pdf]

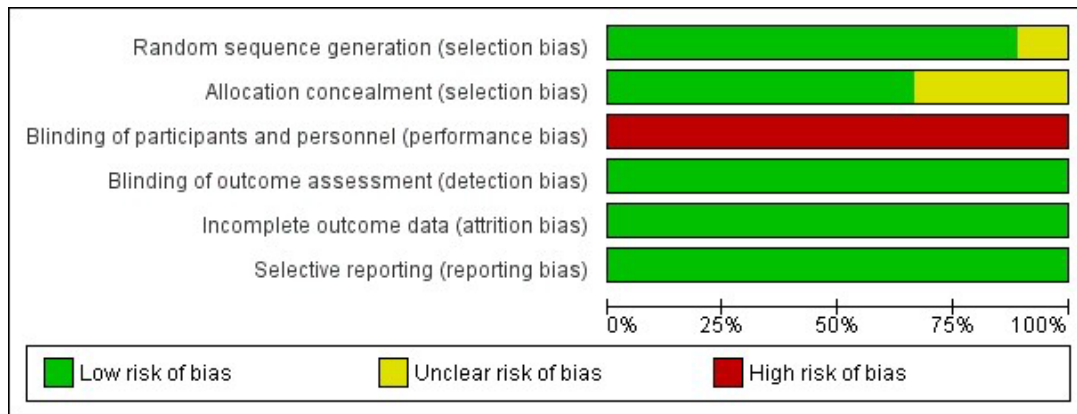

**Figure S1.** Risk of bias graph: review authors' judgements about each risk of bias item presented as percentages across all included studies

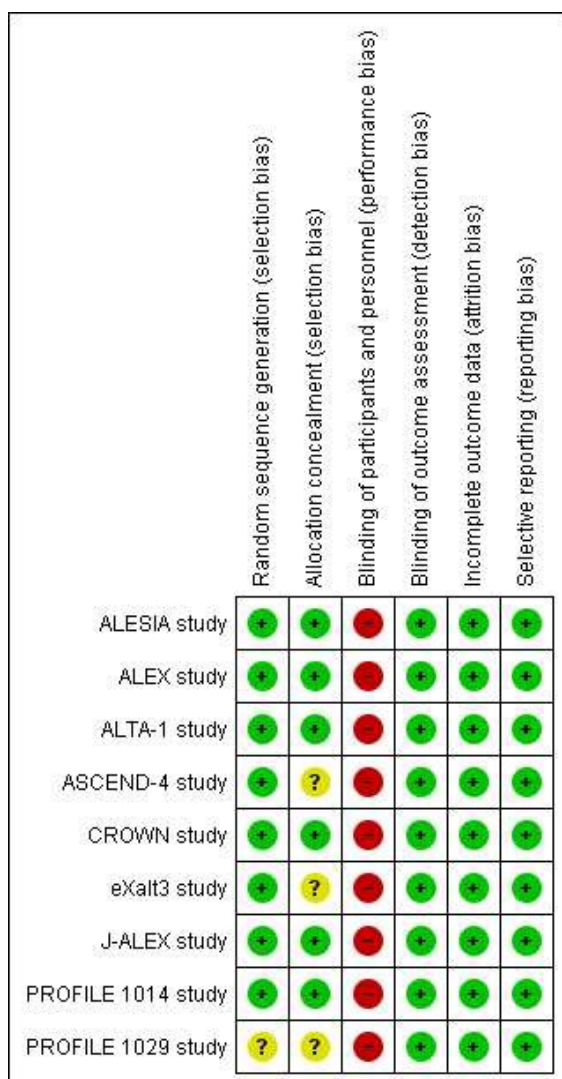

**Figure S2.** Risk of bias summary: review authors' judgements about each risk of bias item for each included study. Green legend: low risk of bias; yellow legend: unclear risk of bias, red legend: high risk of bias

**Table S1.** Summary of the included studies

| Study                      | Year | Updated results | Primary endpoint          | Number of patients (treatment) | Number of patients (control) | Treatment             | Control                                                                                         |
|----------------------------|------|-----------------|---------------------------|--------------------------------|------------------------------|-----------------------|-------------------------------------------------------------------------------------------------|
| Study                      | 2014 | 2019            | BICR-PFS                  | 172                            | 171                          | Crizotinib 250 mg BID | Cisplatin 75 mg/m <sup>2</sup> or carboplatin AUC 5–6 plus pemetrexed 500 mg/m <sup>2</sup> q21 |
| <b>PROFILE 1014 [6, A]</b> | 2017 | NA              | BICR-PFS                  | 189                            | 187                          | Ceritinib 750 mg      | Cisplatin 75 mg/m <sup>2</sup> or carboplatin AUC 5–6 plus pemetrexed 500 mg/m <sup>2</sup> q21 |
| <b>ASCEND-4 [11]</b>       | 2017 | 2020            | BICR-PFS                  | 103                            | 104                          | Alectinib 300 mg BID  | Crizotinib 250 mg BID                                                                           |
| <b>J-ALEX [9, B]</b>       | 2017 | 2020            | Investigator-assessed PFS | 152                            | 151                          | Alectinib 600 mg BID  | Crizotinib 250 mg BID                                                                           |
| <b>ALEX [12, 22]</b>       | 2018 | NA              | BICR-PFS                  | 77                             | 89                           | Crizotinib 250 mg BID | Cisplatin 75 mg/m <sup>2</sup> or carboplatin AUC 5–6 plus pemetrexed 500 mg/m <sup>2</sup> q21 |
| <b>PROFILE 1029 [C]</b>    | 2020 | 2022            | BICR-PFS                  | 149                            | 147                          | Lorlatinib 100 mg     | Crizotinib 250 mg BID                                                                           |
| <b>CROWN [10, D]</b>       | 2019 | NA              | Investigator-assessed PFS | 125                            | 62                           | Alectinib 600 mg BID  | Crizotinib 250 mg BID                                                                           |
| <b>ALESIA [8]</b>          | 2018 | 2021            | BICR-PFS                  | 137                            | 138                          | Brigatinib 180 mg     | Crizotinib 250 mg BID                                                                           |
| <b>ALTA-1 [E, F]</b>       | 2021 | NA              | BICR-PFS                  | 143                            | 147                          | Ensartinib 225 mg     | Crizotinib 250 mg BID                                                                           |

NA: not applicable

**Table S2.** Results of studies included

| Study                      | Follow up                | Year | Median Follow Up                           | Progression free survival                                    | Overall survival                                            |
|----------------------------|--------------------------|------|--------------------------------------------|--------------------------------------------------------------|-------------------------------------------------------------|
| <b>PROFILE 1014 [6, A]</b> | <b>First publication</b> | 2014 | 16.7 months and 17.4 months, respectively  | 7 vs 10.9, HR 0.45 [95% CI, 0.35 to 0.4]; $P < 0.001$        | NR vs NR HR 0.82 [95% CI, 0.54 to 1.26]; $P < 0.36$         |
|                            | <b>Updated results</b>   | 2018 | 45.5 months and 45.7 months, respectively  | NA                                                           | 47.5 vs NR HR 0.760 [95% CI, 0.548 to 1.053]; $P < 0.0978$  |
| <b>ASCEND-4 [11]</b>       | <b>First publication</b> | 2017 | 19.7 months in both arms                   | 8.1 vs 16.6, HR 0.55 [95% CI, 0.42 to 0.73]; $P < 0.001$     | 26.2 vs NR HR 0.73 [95% CI, 0.5 to 1.08]; $P < 0.056$       |
|                            | <b>Updated results</b>   | NA   | NA                                         | NA                                                           | NA                                                          |
| <b>J-ALEX [9, B]</b>       | <b>First publication</b> | 2017 | 12.2 months and 12 months, respectively    | 10.2 vs NR, HR 0.34 [95% CI, 0.17 to 0.71]; $P < 0.0001$     | NA                                                          |
|                            | <b>Updated results</b>   | 2020 | 42.2 months and 42.4 months, respectively  | 10.2 vs 34.1, HR 0.37 [95% CI, 0.26 to 0.52];                | 43.7 vs NR HR 0.8 [95% CI, 0.35 to 1.82];                   |
| <b>ALEX [12, 22]</b>       | <b>First publication</b> | 2017 | 17.6 months and 18.36 months, respectively | 11.1 vs NR, HR 0.47 [95% CI, 0.34 to 0.65]; $P < 0.001$      | NR vs NR HR 0.76 [95% CI, 0.48 to 1.2]; $P < 0.24$          |
|                            | <b>Updated results</b>   | 2020 | 46 months in both arms                     | 10.9 vs 34.8, HR 0.43 [95% CI, 0.32 to 0.58]; $P < 0.0001$   | 57.4 vs NR HR 0.67 [95% CI, 0.46 to 0.98]; $P < 0.0376$     |
| <b>PROFILE 1029 [C]</b>    | <b>First publication</b> | 2018 | 21.6 months and 22.5 months, respectively  | 6.8 vs 11.1, HR 0.402 [95% CI, 0.286 to 0.565]; $P < 0.0001$ | 27.7 vs 28.5 HR 0.879 [95% CI, 0.556 to 1.445]; $P < 0.327$ |
|                            | <b>Updated</b>           | NA   | NA                                         | NA                                                           | NA                                                          |

|                      | results                  |      |                                           |                                                                 |                                                          |
|----------------------|--------------------------|------|-------------------------------------------|-----------------------------------------------------------------|----------------------------------------------------------|
| <b>CROWN [10, D]</b> | <b>First publication</b> | 2020 | 14.8 months and 18.3 months, respectively | 9.3 vs NR, HR 0.28 [95% CI, 0.19 to 0.41]; <i>P</i> < 0.001     | NR vs NR HR 0.72 [95% CI, 0.41 to 1.25]; <i>P</i> n.s.   |
|                      | <b>Updated results</b>   | 2022 | 29.3 months and 36.7 months, respectively | 9.3 vs NR, HR 0.27 [95% CI, 0.18 to 0.39];                      | NA                                                       |
| <b>ALESIA [8]</b>    | <b>First publication</b> | 2019 | 15 months and 16.2 months, respectively   | 11.1 vs NR, HR 0.22 [95% CI, 0.13 to 0.38]; <i>P</i> < 0.0001   | NR vs NR HR 0.28 [95% CI, 0.12 to 0.68];                 |
|                      | <b>Updated results</b>   | NA   | NA                                        | NA                                                              | NA                                                       |
| <b>ALTA-1 [E, F]</b> | <b>First publication</b> | 2018 | 9.3 months and 11 months, respectively    | 9.8 vs NR, HR 0.49 [95% CI, 0.33 to 0.74]; <i>P</i> < 0.001     | NR vs NR HR 0.98 [95% CI, 0.5 to 1.93];                  |
|                      | <b>Updated results</b>   | 2021 | 15.2 months and 40.4 months, respectively | 11.1 vs 40.4, HR 0.48 [95% CI, 0.35 to 0.66]; <i>P</i> < 0.0001 | NR vs NR HR 0.81 [95% CI, 0.53 to 1.22];                 |
| <b>eXalt3 [13]</b>   | <b>First publication</b> | 2021 | 20.2 months and 23.8 months, respectively | 12.7 vs 25.8, HR 0.51 [95% CI, 0.35 to 0.72]; <i>P</i> < 0.0001 | NR vs NR HR 0.91 [95% CI, 0.54 to 1.54]; <i>P</i> = 0.73 |
|                      | <b>Updated results</b>   | NA   | NA                                        | NA                                                              | NA                                                       |

NA: not applicable

## References of supplementary materials

A. Solomon BJ, Kim DW, Wu YL, Nakagawa K, Mekhail T, Felip E, et al. Final overall survival analysis from a study comparing first-line crizotinib *versus* chemotherapy in ALK-mutation-positive non-small-cell lung cancer. *J Clin Oncol.* 2018;36:2251–8.

B. Nakagawa K, Hida T, Nokihara H, Morise M, Azuma K, Kim YH, et al. Final progression-free survival results from the J-ALEX study of alectinib *versus* crizotinib in *ALK*-positive non-small-cell lung cancer. *Lung Cancer*. 2020;139:195–9.

C. Wu YL, Lu S, Lu Y, Zhou J, Shi YK, Sriuranpong V, et al. Results of PROFILE 1029, a phase III comparison of first-line crizotinib *versus* chemotherapy in East Asian patients with *ALK*-positive advanced non-small cell lung cancer. *J Thorac Oncol*. 2018;13:1539–48.

D. Qing Z, Kim HR, Soo RA, Chiu CH, Hayashi H, Kim SW, et al. 992P Updated analyses from the CROWN study of first-line lorlatinib *vs* crizotinib in Asian patients with *ALK*-positive non-small cell lung cancer (NSCLC). *Ann Oncol*. 2022;33:S1007.

E. Camidge DR, Kim HR, Ahn MJ, Yang JCH, Han JY, Hochmair MJ, et al. Brigatinib *versus* crizotinib in *ALK* inhibitor-naïve advanced *ALK*-positive NSCLC: final results of phase 3 ALTA-1L trial. *J Thorac Oncol*. 2021;16:2091–108. Erratum in: *J Thorac Oncol*. 2022;[Epub ahead of print].

F. Camidge DR, Kim HR, Ahn MJ, Yang JC, Han JY, Lee JS, et al. Brigatinib *versus* crizotinib in *ALK*-positive non-small-cell lung cancer. *N Engl J Med*. 2018;379:2027–39.
